# Supplementary material for: An efficient photocatalytic system composed of Ti3C2 quantum dots incorporated in TiO2 nanosheets and CuWO4 nanoparticles: fabrication and its photocatalytic activity for H2 production
Source: Royal Society of Chemistry journal article supplement (doi:10.1039/d2nj05007b), 2022-12-14
Supplement: d2nj05007b1.pdf [file d2nj05007b1.pdf]

## Supplementary Data

**An efficient photocatalytic system composed of  $\text{Ti}_3\text{C}_2$  quantum dots incorporated  $\text{TiO}_2$  nanosheets and  $\text{CuWO}_4$  nanoparticles: Fabrication and its photocatalytic activity for  $\text{H}_2$  production**

Shiyi Ren, Lixia Qin, Taiyang Zhang, Xiangqing Li, Shi-Zhao Kang\*

*School of Chemical and Environmental Engineering, Shanghai Institute of Technology, 100 Haiquan Road, Shanghai 201418, China*

\* Corresponding author: Shi-Zhao Kang, Tel./fax: +86 21 60873061.

*E-mail address:* kangsz@sit.edu.cn (S.-Z. Kang)

Supplementary Fig. S1

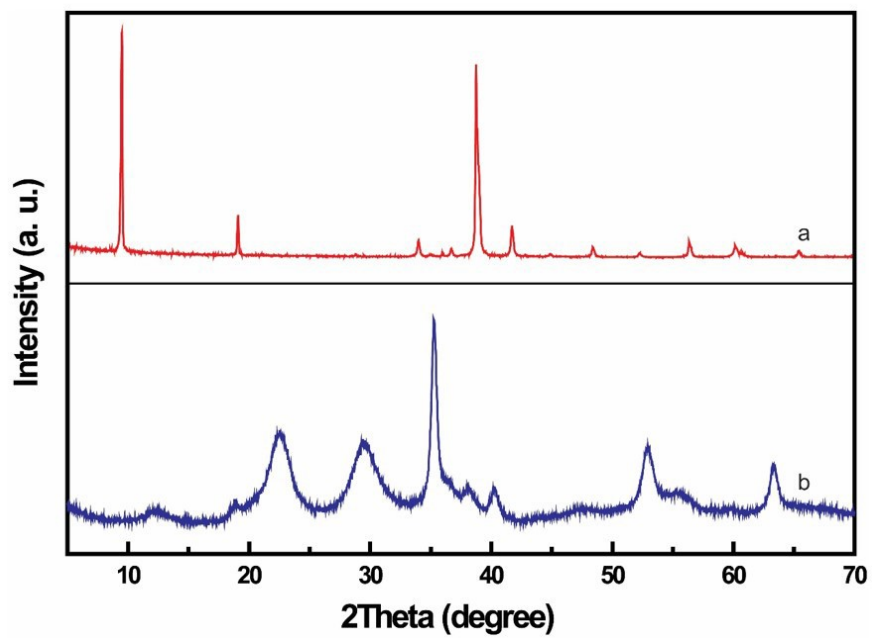

**Fig. S1.** XRD patterns of (a)  $\text{Ti}_3\text{AlC}_2$  and (b) the  $\text{CuWO}_4$  nanoparticles.

Supplementary Fig. S2

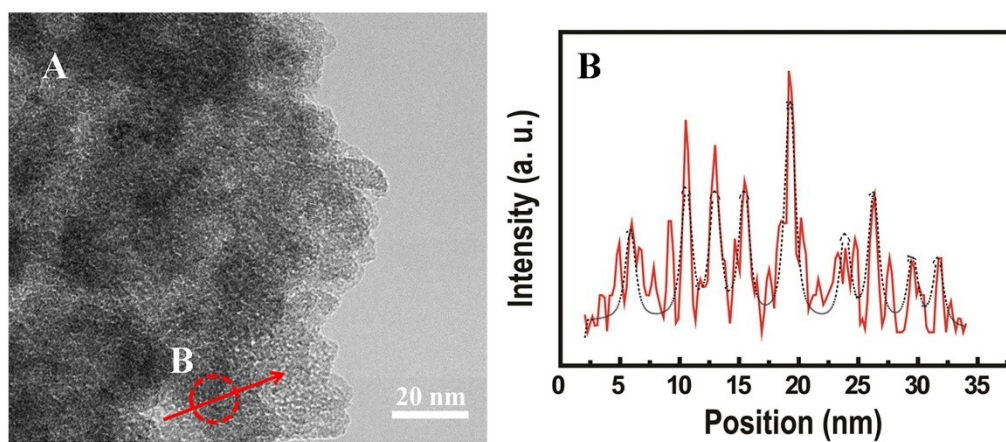

**Fig. S2.** (A) HRTEM image of 4% CuWO<sub>4</sub>-Ti<sub>3</sub>C<sub>2</sub>/TiO<sub>2</sub> and (B) C element TEM-EDS line profile along the red arrow shown in Fig. S2A (red) and curve-fitting analysis (black).

Supplementary Fig. S3

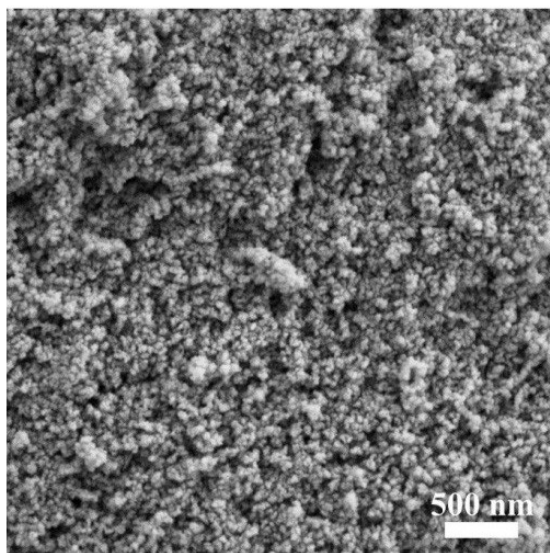

**Fig. S3.** SEM image of  $\text{CuWO}_4$  nanoparticles.

Supplementary Fig. S4

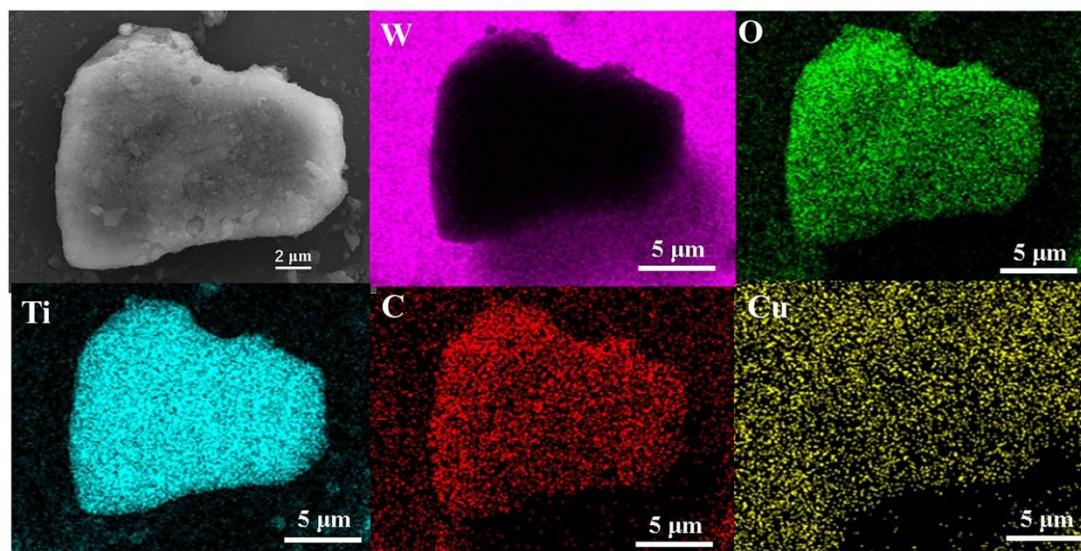

**Fig. S4.** Element mappings of 4%  $\text{CuWO}_4\text{-Ti}_3\text{C}_2/\text{TiO}_2$  (W, O, Ti, C and Cu).

Supplementary Fig. S5

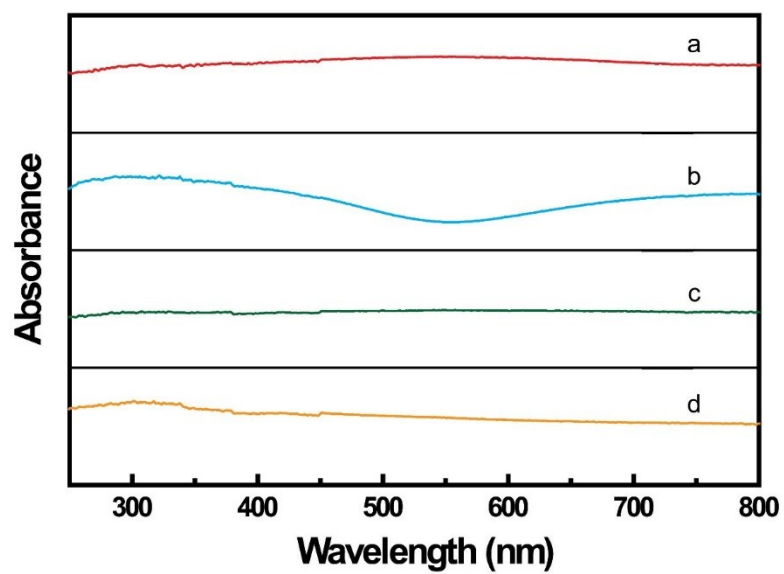

**Fig. S5.** UV-vis spectra of (a) the  $\text{Ti}_3\text{C}_2$  nanosheets, (b) the  $\text{CuWO}_4$  nanoparticles, (c)  $\text{Ti}_3\text{C}_2/\text{TiO}_2$ , and (d) 4%  $\text{CuWO}_4\text{-Ti}_3\text{C}_2/\text{TiO}_2$ .

Supplementary Fig. S6

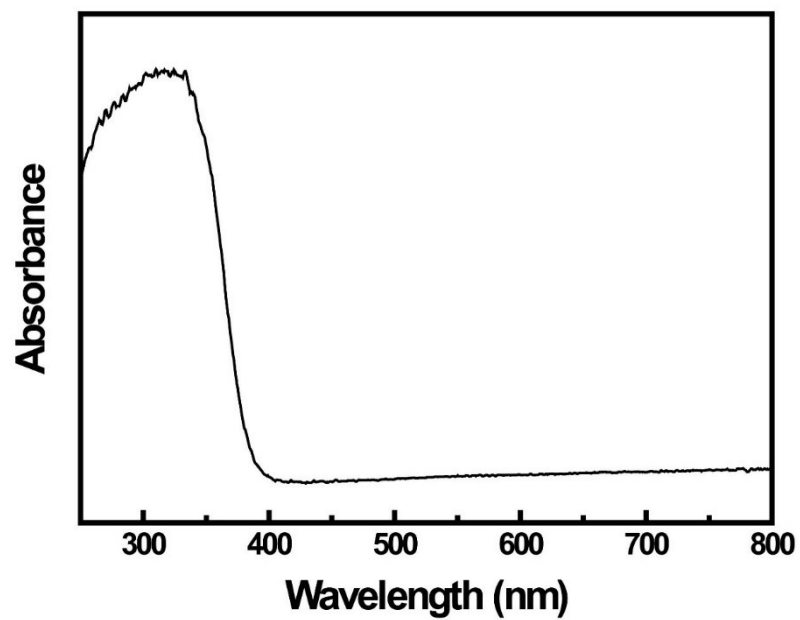

**Fig. S6.** UV-vis spectrum of P25.

## Supplementary Table S1

**Table S1.** Photocatalytic activities of the photocatalysts reported previously.

| <b>Photocatalyst</b>                                                    | <b>Rate of H<sub>2</sub> evolution<br/>(mmol g<sup>-1</sup> h<sup>-1</sup>)</b> | <b>Stable hydrogen<br/>production time (h)</b> | <b>Ref.</b> |
|-------------------------------------------------------------------------|---------------------------------------------------------------------------------|------------------------------------------------|-------------|
| CuWO <sub>4</sub> -<br>Ti <sub>3</sub> C <sub>2</sub> /TiO <sub>2</sub> | 3.65                                                                            | 14                                             | This work   |
| Pt-TiO <sub>2</sub>                                                     | 0.16                                                                            | 5                                              | [1]         |
| Ti <sub>3</sub> C <sub>2</sub> -TiO <sub>2</sub> /Pt                    | 1.60                                                                            | 12                                             | [2]         |
| Au/TiO <sub>2</sub>                                                     | 0.36                                                                            | 4                                              | [3]         |
| Pd/TiO <sub>2</sub>                                                     | 3.10                                                                            | 1                                              | [4]         |
| TiO <sub>2</sub> -Ti <sub>3</sub> C <sub>2</sub> /Ru                    | 0.24                                                                            | 5                                              | [5]         |
| CuO/TiO <sub>2</sub>                                                    | 2.00                                                                            | 3                                              | [6]         |
| Truxene/TiO <sub>2</sub>                                                | 21                                                                              | 5                                              | [7]         |
| MoS <sub>2</sub> /TiO <sub>2</sub>                                      | 1.38                                                                            | 4                                              | [8]         |
| CdS/Ni-MOF                                                              | 2.51                                                                            | 3                                              | [9]         |
| CdS/CuS                                                                 | 0.30                                                                            | 4                                              | [10]        |
| Pt/IrO <sub>2</sub> /g-C <sub>3</sub> N <sub>4</sub>                    | 2.47                                                                            | 2                                              | [11]        |
| WO <sub>3</sub> -MoS <sub>2</sub> -Pt                                   | 0.80                                                                            | 2                                              | [12]        |
| Zn-AgIn <sub>5</sub> S <sub>8</sub> /NiS                                | 5.2                                                                             | 5                                              | [13]        |



Supplementary Fig. S7

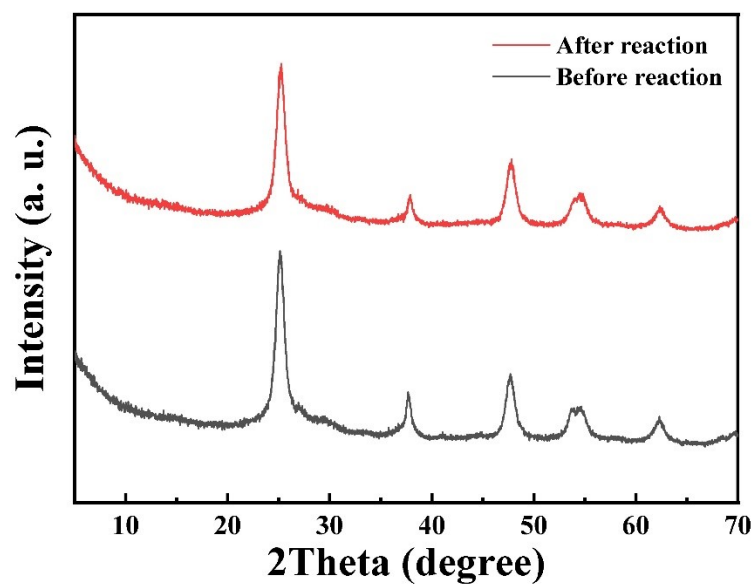

**Fig. S7.** XRD patterns of 4%  $\text{CuWO}_4\text{-Ti}_3\text{C}_2/\text{TiO}_2$  before and after photocatalytic reaction.

Supplementary Fig. S8

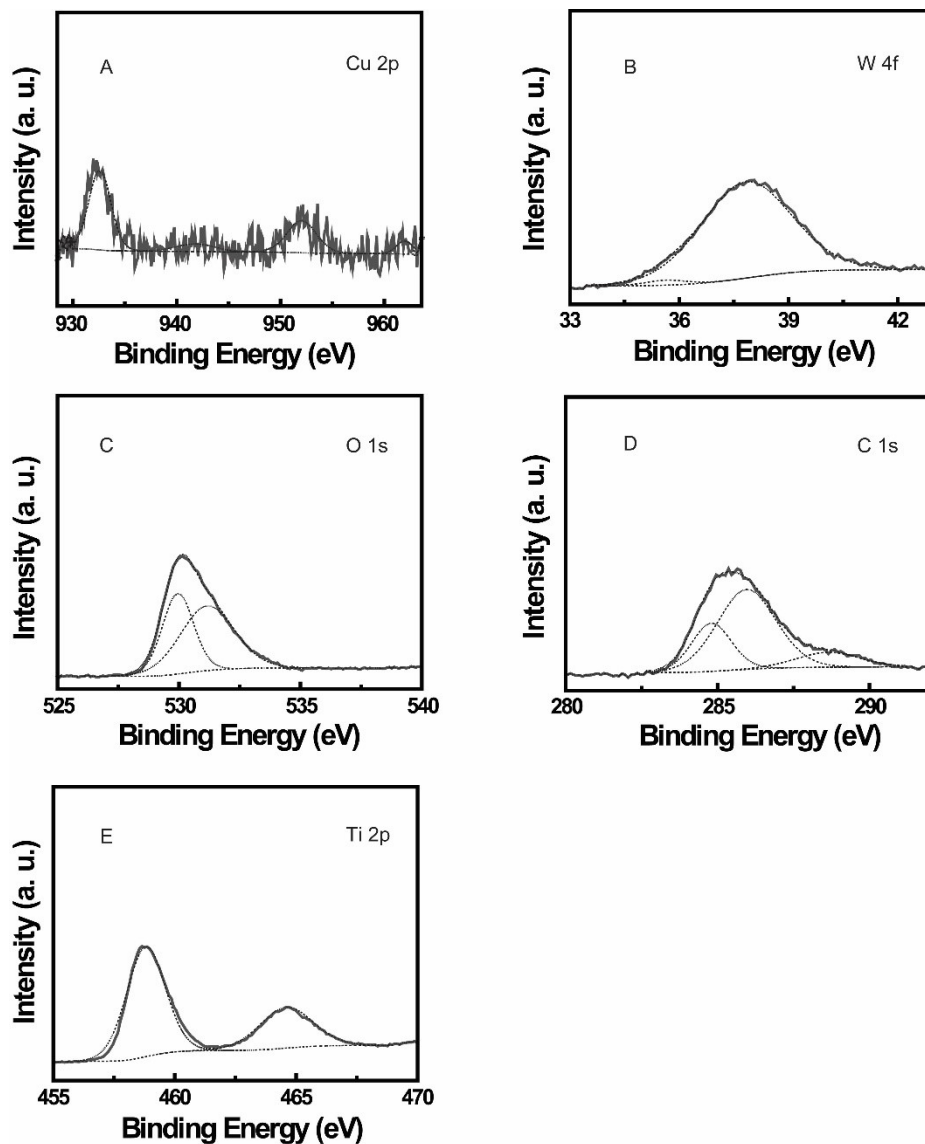

**Fig. S8.** XPS spectra of the used 4% CuWO<sub>4</sub>-Ti<sub>3</sub>C<sub>2</sub>/TiO<sub>2</sub>: (A) Cu 2p, (B) W 4f, (C) O 1s, (D) C 1s and (E) Ti 2p, high-resolution XPS spectra (solid) and curve-fitting analysis (dot line) of the states of Cu, W, O, C, and Ti.

Supplementary Fig. S9

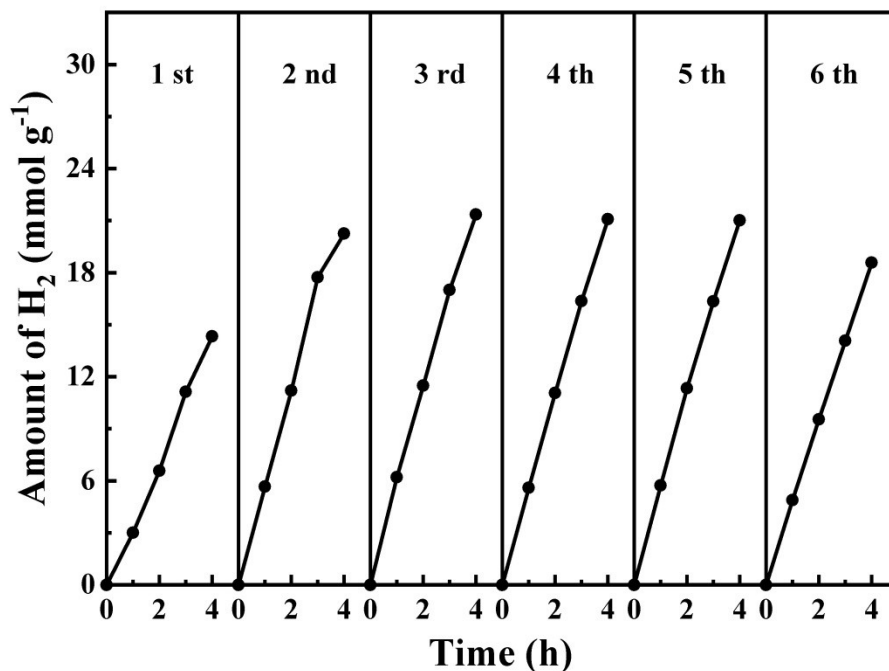

**Fig. S9.** Photostability of 4% CuWO<sub>4</sub>-Ti<sub>3</sub>C<sub>2</sub>/TiO<sub>2</sub> for photocatalytic hydrogen evolution (photocatalyst 10 mg; ethylene glycol aqueous solution 60 mL, 16.7vol.%; pH = 8; temperature 10°C; irradiation time between the two cycles 10 min).

Supplementary Fig. S10

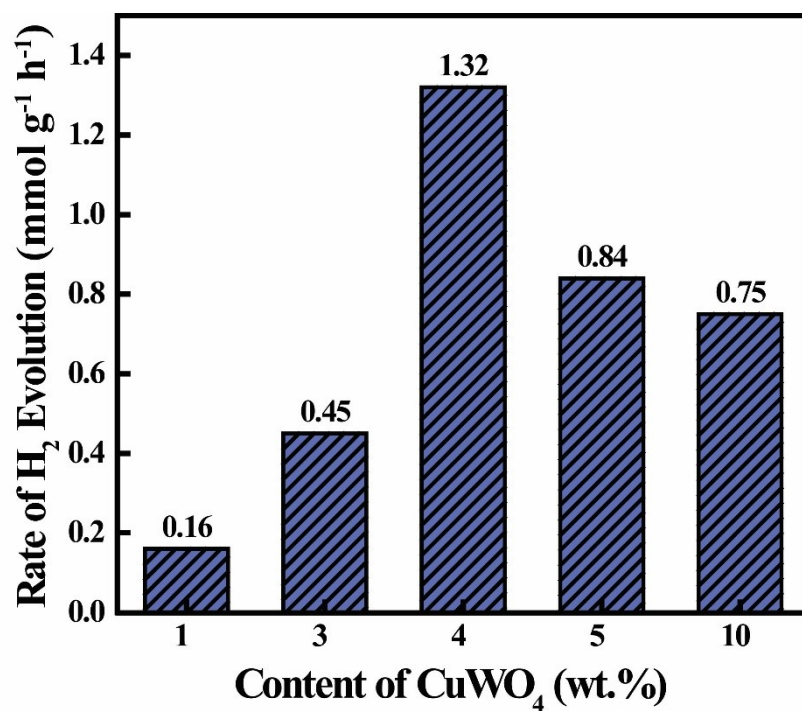

**Fig. S10.** Effect of the content of CuWO<sub>4</sub> nanoparticles on the photocatalytic activity of CuWO<sub>4</sub>-Ti<sub>3</sub>C<sub>2</sub>/TiO<sub>2</sub> (photocatalyst 10 mg; ethylene glycol aqueous solution 60 mL, 16.7vol.%; pH = 7; temperature 10°C; irradiation time 4 h).

Supplementary Fig. S11

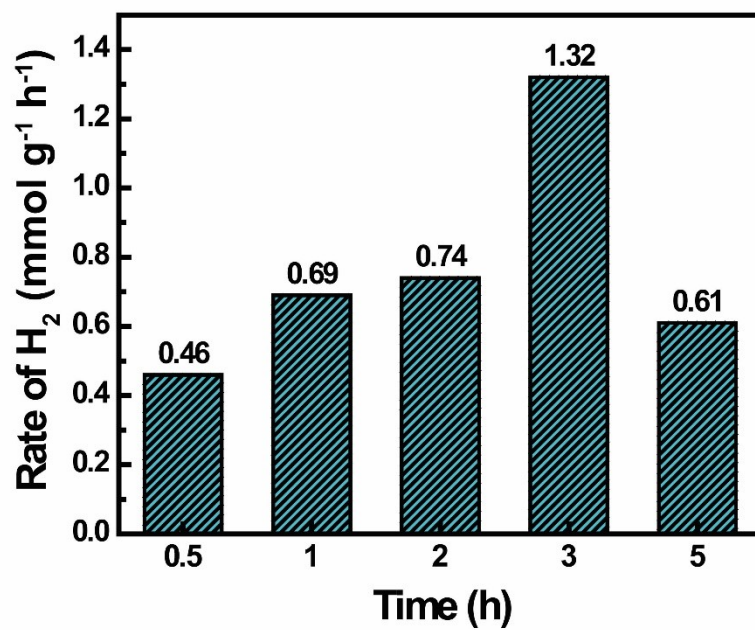

**Fig. S11.** Effect of oxidation time on the photocatalytic activity of 4% CuWO<sub>4</sub>-Ti<sub>3</sub>C<sub>2</sub>/TiO<sub>2</sub> (photocatalyst 10 mg; ethylene glycol aqueous solution 60 mL, 16.7vol.%; pH = 7; temperature 10°C; irradiation time 4 h).

Supplementary Fig. S12

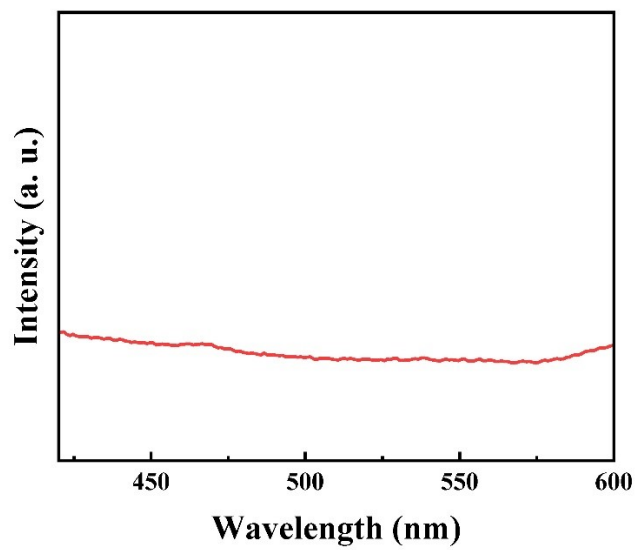

**Fig. S12.** Fluorescence spectrum of the Ti<sub>3</sub>C<sub>2</sub> nanosheets (excitation wavelength 320 nm).

Supplementary Fig. S13

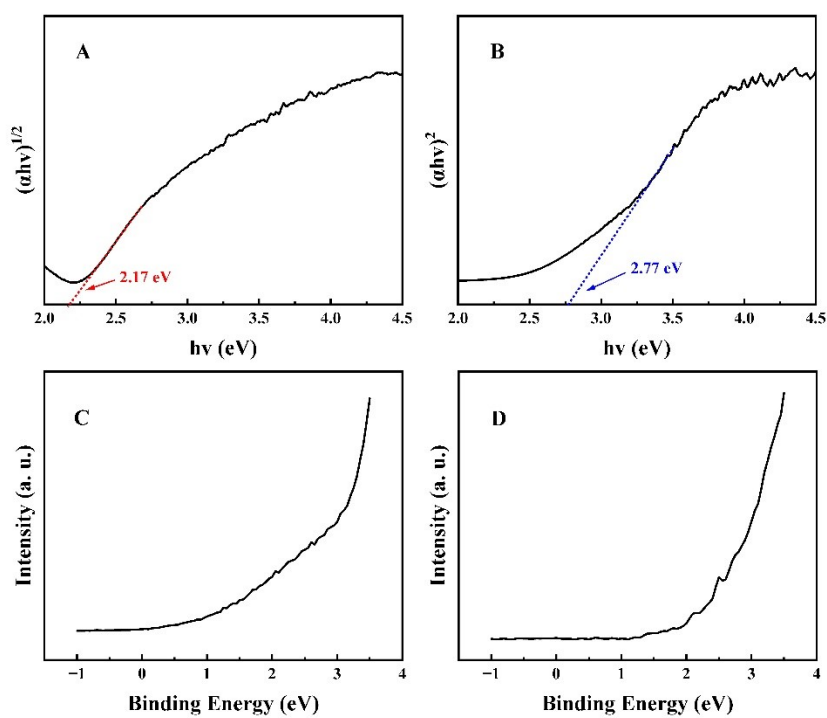

**Fig. S13.** Tauc plots of (A) the CuWO<sub>4</sub> nanoparticles and (B) the TiO<sub>2</sub> nanosheets, and UPS spectra of (C) the CuWO<sub>4</sub> nanoparticles and (D) the TiO<sub>2</sub> nanosheets.

## References

- 1 S. Y. Moon, B. Naik, K. An, S. M. Kim and J. Y. Park, *RSC Adv.*, 2016, **6**, 18198-18203.
- 2 Y. Li, X. Deng, J. Tian, Z. Liang and H. Cui, *Appl. Mater. Today*, 2018, **13**, 217-227.
- 3 N. Kunthakudee, T. Puangpetch, P. Ramakul, K. Serivalsatit and M. Hunsom, *Int. J. Hydrogen Energy*, 2022, **47**, 23570-23582.
- 4 J. Wu, S. Lu, D. Ge, L. Zhang, W. Chen and H. Gu, *RSC Adv.*, 2016, **6**, 67502-67508.
- 5 Y. Liu, Y.-H. Li, X. Li, Q. Zhang, H. Yu, X. Peng and F. Peng, *ACS Nano*, 2020, **14**, 14181-14189.
- 6 Y. Wang, M. Zhou, Y. He, Z. Zhou and Z. Sun, *J. Alloys Compd.*, 2020, **813**, 152184.
- 7 A. Valverde-Gonzalez, C. G. L. Calixto, M. Barawi, M. Gomez-Mendoza, V. A. de la P. O'Shea, M. Liras, B. Gomez-Lor, and M. Iglesias, *ACS Appl. Energy Mater.*, 2020, **3**, 4411-4420.
- 8 A. Tiwari, A. Gautam, S. Sk, D. S. Gavali, R. Thapa and U. Pal, *J. Phys. Chem. C*, 2021, **125**, 11950-11962.
- 9 J. Guo, Y. Liang, L. Liu, J. Hu, H. Wang, W. An and W. Cui, *Appl. Surf. Sci.*, 2020, **522**, 146356.
- 10 X. Yang, G. Lu, B. Wang, T. Wang and Y. Wang, *RSC Adv.*, 2019, **9**, 25142.
- 11 C. Chen, J. Zhao and Y. Xu, *Catal. Sci. Technol.*, 2020, **10**, 6378-6386.
- 12 X. Cui, Y. Zhou, J. Wu, S. Ling, L. Zhao, J. Zhang, J. Wang, W. Qin and Y. Zhang, *Nanotechnology*, 2020, **31**, 185701.
- 13 D. Zhang, W. Cao, B. Mao, Y. Liu, F. Li, W. Dong, T. Jiang, Y.-C.



Yong, and W. Shi, *Ind. Eng. Chem. Res.*, 2020, **59**, 16249-16257.
